# Supplementary material for: Rapid Killing and Biofilm Inhibition of Multidrug-Resistant Acinetobacter baumannii Strains and Other Microbes by Iodoindoles
Source: PubMed Central journal article supplement (PMC7465641; doi:10.3390/biom10081186), 2020-08-14
Supplement: biomolecules-10-01186-s001.pdf [file biomolecules-10-01186-s001.pdf]

# Rapid Killing and Biofilm Inhibition of Multidrug-Resistant *Acinetobacter baumannii* Strains and Other Microbes by Iodoindoles

Chaitany Jayprakash Raorane <sup>†</sup>, Jin-Hyung Lee <sup>†</sup> and Jintae Lee <sup>\*</sup>

School of Chemical Engineering, Yeungnam University, Gyeongsan 38541, Republic of Korea; chaitanyaraorane22@ynu.ac.kr (C.J.R.); jinhlee@ynu.ac.kr (J.-H.L.)

<sup>\*</sup> Correspondence: jtlee@ynu.ac.kr; Tel.: +82-53-810-2533; Fax: +82-53-810-4631

<sup>†</sup> These authors contributed equally to this work.

## Supplementary data

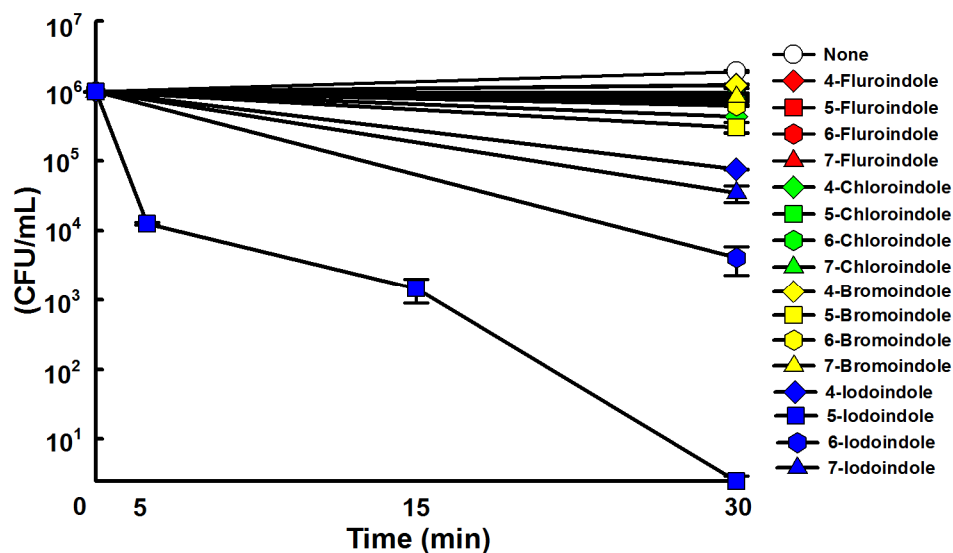

**Figure S1. Rapid killing of *Acinetobacter baumannii* ATCC 17978 by halogenated indoles.** *A.* *baumannii* cultures were treated with 0 or 200  $\mu\text{g/ml}$  of the listed halogenated indoles. After incubation, cultures were plated, and CFUs were enumerated. Error bars represent standard deviation.

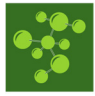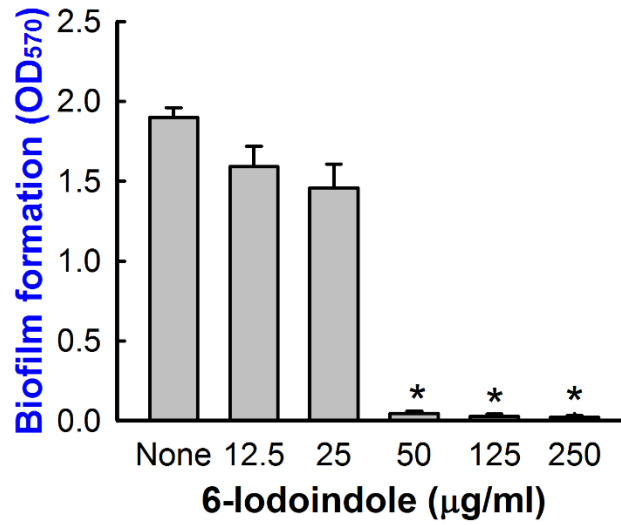

**Figure S2. Biofilm inhibition of *A. baumannii* by 6-iodoindole.** Biofilm inhibitory effects of 6-iodoindole against *A. baumannii* strains ATCC 17978 after culture for 24 h at 37°C without shaking. Error bars represent standard deviation. \* $p < 0.05$  versus untreated controls.

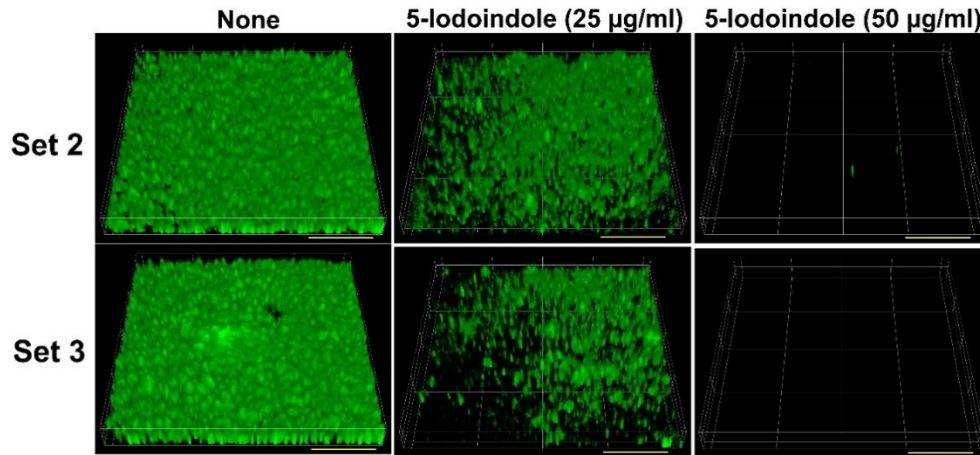

Figure S3. Additional confocal microscopic images showing biofilm inhibition of *A. baumannii*.

Scale bar = 50 µm.

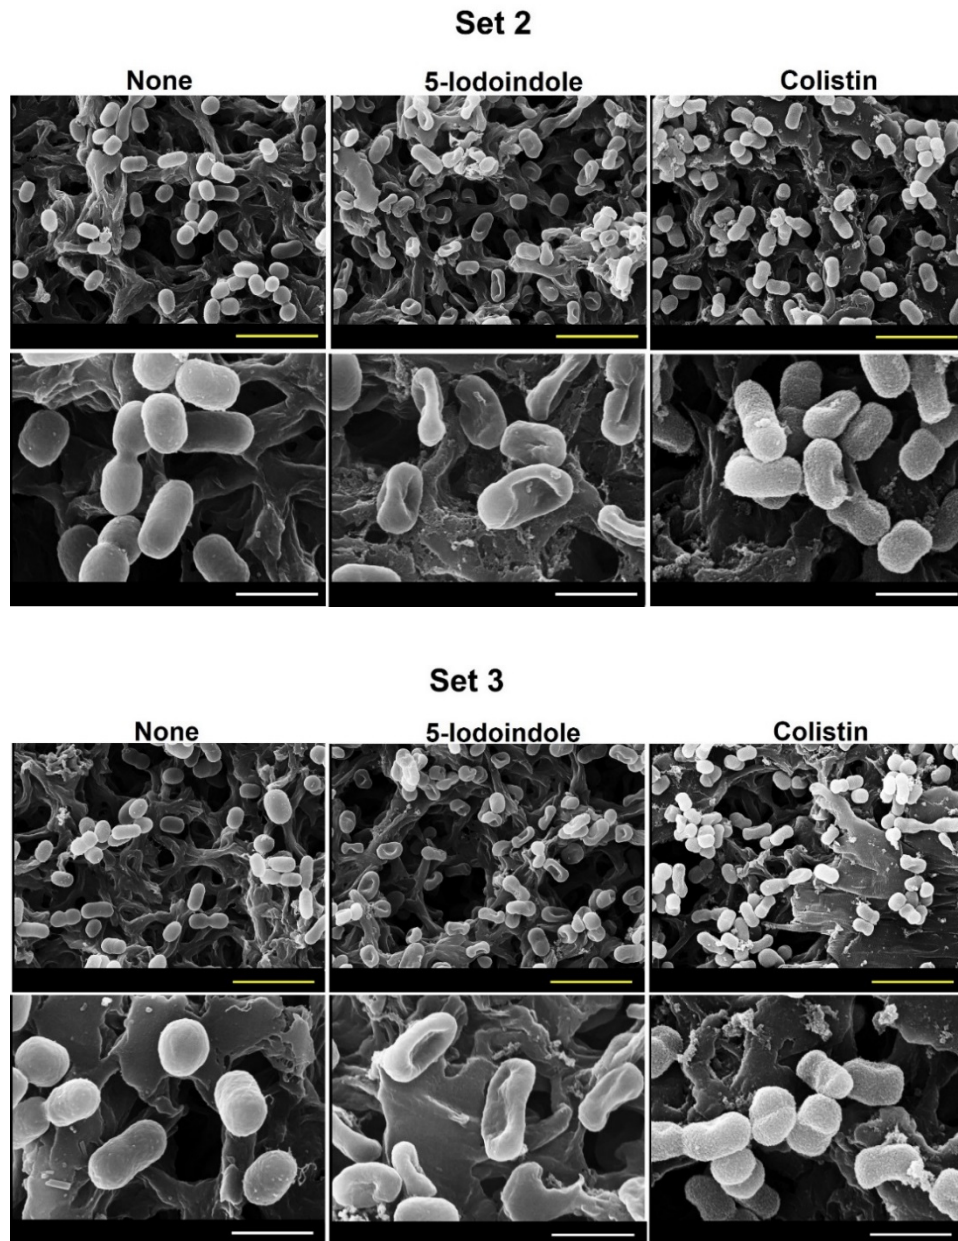

**Figure S4. Additional SEM images showing membrane damage by 5-iodoindole in *A. baumannii* cells.** Cells were grown with or without 5-iodoindole (125  $\mu\text{g}/\text{ml}$ ) and or colistin (200  $\mu\text{g}/\text{ml}$ ; positive control) for 1 h and fixed on nylon membrane filters (0.45  $\mu\text{m}$ ). Scale bar: yellow = 3  $\mu\text{m}$ , white = 1  $\mu\text{m}$ .

**Table S1.** Determination of minimum inhibitory concentrations (MICs) of 5-iodoindole for *A. baumannii* ATCC 17978 and clinical isolates. MIC determinations after culture for 24 h at 37°C in 96-well plates in the presence of 5-iodoindole.

|                                                                                                                              | <i>A. baumannii</i><br>strain | 5-Iodoindole<br>MIC (µg/ml) | Antibiotic |
|------------------------------------------------------------------------------------------------------------------------------|-------------------------------|-----------------------------|------------|
| <b>Reference strain</b>                                                                                                      | ATCC 17978                    | 50                          | Sensitive  |
|                                                                                                                              | ATCC BAA-1709                 | 50                          | Sensitive  |
| <b>Clinical isolates<br/>obtained from<br/>burns patients at<br/>the National<br/>Rehabilitation<br/>Institute of Mexico</b> | A 550                         | 50                          | MDR        |
|                                                                                                                              | A 553                         | 50                          | MDR        |
|                                                                                                                              | A 556                         | 50                          | MDR        |
|                                                                                                                              | A 564                         | 50                          | MDR        |
|                                                                                                                              | A 571                         | 50                          | Sensitive  |
|                                                                                                                              | A 578                         | 50                          | MDR        |
|                                                                                                                              | A 580                         | 50                          | MDR        |

**Table S2.** MICs of halogenated indole derivatives against *A. baumannii* ATCC 17978.

| <b>Chemical name</b> | <b>MIC (<math>\mu\text{g/ml}</math>)</b> |
|----------------------|------------------------------------------|
| 4-Bromoindole        | 125                                      |
| 5-Bromoindole        | 125                                      |
| 6-Bromoindole        | 125                                      |
| 7-Bromoindole        | 125                                      |
| 4-Chloroindole       | 100                                      |
| 5-Chloroindole       | 125                                      |
| 6-Chloroindole       | 125                                      |
| 7-Chloroindole       | 200                                      |
| 4-Fluroindole        | 125                                      |
| 5-Fluroindole        | 125                                      |
| 6-Fluroindole        | 250                                      |
| 7-Fluroindole        | >250                                     |
| 4-Iodoindole         | 100                                      |
| 5-Iodoindole         | 50                                       |
| 6-Iodoindole         | 50                                       |
| 7-Iodoindole         | 125                                      |

**Table S3.** Antibiofilm and antibacterial activities of indole compounds against *A. baumannii* ATCC 17978. The biofilm screening of *A. baumannii* ATCC 17978 was performed after culture in TSB for 24 h at 37°C in 96-well polystyrene plates in the presence of indole derivatives at 50 µg/ml.

| <b>Name</b>                       | <b>Structure</b> | <b>Biofilm (%)</b> | <b>Cell growth (%)</b> |
|-----------------------------------|------------------|--------------------|------------------------|
| <b>None</b>                       |                  | 100                | 100                    |
| <b>4-Bromoindole</b>              |                  | 38 ± 8             | 32 ± 7                 |
| <b>5-Bromoindole</b>              |                  | 90 ± 7             | 66 ± 3                 |
| <b>6- Bromoindole</b>             |                  | 114 ± 8            | 68 ± 7                 |
| <b>7- Bromoindole</b>             |                  | 106 ± 9            | 93 ± 1                 |
| <b>5-Bromo-3-iodo-7-azaindole</b> |                  | 84 ± 9             | 96 ± 4                 |
| <b>4-Chloroindole</b>             |                  | 25 ± 9             | 28 ± 5                 |
| <b>5-Chloroindole</b>             |                  | 119 ± 17           | 50 ± 9                 |
| <b>6-Chloroindole</b>             |                  | 90 ± 5             | 70 ± 10                |
| <b>7-Chloroindole</b>             |                  | 98 ± 9             | 88 ± 2                 |
| <b>5,6-Difluoro<br/>isatin</b>    |                  | 112 ± 3            | 92 ± 2                 |
| <b>2,3-Dimethyl indole</b>        |                  | 54 ± 12            | 80 ± 10                |
| <b>4-Fluoroindole</b>             |                  | 109 ± 3            | 89 ± 2                 |





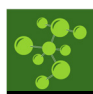

| Name                                     | Structure | Biofilm (%) | Cell growth (%) |
|------------------------------------------|-----------|-------------|-----------------|
| 5-Fluoroindole                           |           | 121 ± 14    | 87 ± 7          |
| 6-Fluoroindole                           |           | 118 ± 5     | 98 ± 2          |
| 7-Fluoroindole                           |           | 127 ± 8     | 91 ± 2          |
| 7-Fluoro-5-iodoindole-3-carboxaldehyde   |           | 75 ± 4      | 102 ± 4         |
| Indole                                   |           | 93 ± 7      | 100 ± 1         |
| 4-Iodoindole                             |           | 40 ± 10     | 90 ± 11         |
| 5-Iodoindole                             |           | 4 ± 1       | 2 ± 1           |
| 6-Iodoindole                             |           | 6 ± 1       | 5 ± 2           |
| 7-Iodoindole                             |           | 94 ± 8      | 79 ± 5          |
| Isatin                                   |           | 75 ± 6      | 94 ± 2          |
| 3-Methyl indole                          |           | 114 ± 7     | 81 ± 2          |
| 7-Nitroindole                            |           | 87 ± 10     | 59 ± 5          |
| 5-Nitroisatin                            |           | 82 ± 3      | 102 ± 1         |
| 5-(Trifluoro methoxy) indoline-2,3-dione |           | 92 ± 2      | 101 ± 3         |

Table S3. continued
